# Supplementary material
Source: publisher site journal article supplement (https://www.dovepress.com/article/537256)

Supplementary table 1. Primer sequences for qRT-PCR.

|  | Forward Primer | Reverse Primer |
| --- | --- | --- |
| GAPDH | GGAGCGAGATCCCTCCAAAAT | GGCTGTTGTCATACTTCTCATGG |
| CXCL17 | TGCTGCCACTAATGCTGATGT | CTCAGGAACCAATCTTTGCACT |
| CCR6 | TTCAGCGATGTTTTCGACTCC | GCAATCGGTACAAATAGCCTGG |
| XCL2 | CAGTGCGTGTCGTGGAGT | GGGTGAGAACTGAATTCCA |
| CCL20 | TGCTGTACCAAGAGTTTGCTC | CGCACACAGACAACTTTTTCTTT |
| CCR4 | CCCACGGATATAGCAGACACC | GTGCAAGGCTTGGGGATACT |
| CCR2 | CCACATCTCGTTCTCGGTTTATC | CAGGGAGCACCGTAATCATAATC |
| XCR1 | ATGGAGTCCTCAGGCAACC | CGAGGGTAGCAAAGACCCA |

Supplementary table 2. The list of CaCRs gene.

| gene | type | gene | type | gene | type | gene | type |
| --- | --- | --- | --- | --- | --- | --- | --- |
| CCL1 | ligand | CCL23 | ligand | CXCL13 | ligand | CXCR3 | receptor |
| CCL2 | ligand | CCL24 | ligand | CXCL14 | ligand | CXCR4 | receptor |
| CCL3 | ligand | CCL25 | ligand | CXCL16 | ligand | CXCR5 | receptor |
| CCL4 | ligand | CCL26 | ligand | CXCL17 | ligand | CXCR6 | receptor |
| CCL4L2 | ligand | CCL27 | ligand | XCL1 | ligand | CX3CR1 | receptor |
| CCL5 | ligand | CCL28 | ligand | XCL2 | ligand | XCR1 | receptor |
| CCL7 | ligand | CXCL1 | ligand | CX3CL1 | ligand | ACKR1 | receptor |
| CCL8 | ligand | CXCL2 | ligand | CCR1 | receptor | ACKR2 | receptor |
| CCL11 | ligand | CXCL3 | ligand | CCR2 | receptor | ACKR3 | receptor |
| CCL13 | ligand | PF4 | ligand | CCR3 | receptor | ACKR4 | receptor |
| CCL14 | ligand | PF4V1 | ligand | CCR4 | receptor | CCRL2 | receptor |
| CCL15 | ligand | CXCL5 | ligand | CCR5 | receptor | GPR182 | receptor |
| CCL16 | ligand | CXCL6 | ligand | CCR6 | receptor |  |  |
| CCL17 | ligand | PPBP | ligand | CCR7 | receptor |  |  |
| CCL18 | ligand | CXCL8 | ligand | CCR8 | receptor |  |  |
| CCL19 | ligand | CXCL9 | ligand | CCR9 | receptor |  |  |
| CCL20 | ligand | CXCL10 | ligand | CCR10 | receptor |  |  |
| CCL21 | ligand | CXCL11 | ligand | CXCR1 | receptor |  |  |
| CCL22 | ligand | CXCL12 | ligand | CXCR2 | receptor |  |  |

Supplementary table 3. Patients information.

| No. | Sex | Age (years) | Tumor type | T stage | N stage | M stage | Treatment |
| --- | --- | --- | --- | --- | --- | --- | --- |
| 1 | Female | 64 | Adenocarcinoma | 2a | 0 | 0 | Surgery+Osimertinib |
| 2 | Female | 58 | Adenocarcinoma | 1b | 0 | 0 | Surgery |
| 3 | Female | 69 | Adenocarcinoma | 2a | 0 | 0 | Surgery |
| 4 | Female | 64 | Adenocarcinoma | 1a | 0 | 0 | Surgery |
| 5 | Female | 65 | Adenocarcinoma | 1c | 0 | 0 | Surgery |
| 6 | Male | 45 | Adenocarcinoma | 1c | 0 | 0 | Surgery |
| 7 | Female | 70 | Adenocarcinoma | 1c | 0 | 0 | Surgery |
| 8 | Female | 52 | Adenocarcinoma | 1c | 0 | 0 | Surgery+Gefitinib |
| 9 | Female | 68 | Adenocarcinoma | 1b | 2 | 0 | Surgery+Ametinib |
| 10 | Female | 71 | Adenocarcinoma | 1c | 0 | 0 | Surgery |
| 11 | Female | 74 | Adenocarcinoma | 1c | 1 | 0 | Surgery+Chemotherapy |
| 12 | Male | 67 | Adenocarcinoma | 1c | 0 | 0 | Surgery |
| 13 | Male | 63 | Adenocarcinoma | 1b | 0 | 0 | Surgery |
| 14 | Female | 45 | Adenocarcinoma | 1c | 0 | 0 | Surgery |
| 15 | Female | 67 | Adenocarcinoma | 1b | 0 | 0 | Surgery |
| 16 | Female | 77 | Adenocarcinoma | 1c | 0 | 0 | Surgery |
| 17 | Female | 66 | Adenocarcinoma | 3 | 2b | 0 | Surgery |
| 18 | Male | 60 | Squamous cell carcinoma | 2a | 0 | 0 | Surgery |
| 19 | Male | 72 | Squamous cell carcinoma | 1a | 0 | 0 | Surgery |
| 20 | Male | 59 | Squamous cell carcinoma | 1c | 0 | 0 | Surgery |
| 21 | Male | 58 | Squamous cell carcinoma | 1c | 1 | 0 | Surgery |
| 22 | Male | 65 | Squamous cell carcinoma | 1c | 2 | 0 | Surgery+Chemotherapy |
| 23 | Male | 64 | Squamous cell carcinoma | 4 | 0 | 0 | Surgery+Chemotherapy |
| 24 | Female | 63 | Adenocarcinoma | 3 | 0 | 0 | Surgery+Chemotherapy+Icotinib |
| 25 | Male | 60 | Adenocarcinoma | 1b | 0 | 0 | Surgery |
| 26 | Male | 73 | Squamous cell carcinoma | 1c | 0 | 0 | Surgery |
| 27 | Male | 64 | Squamous cell carcinoma | 1b | 0 | 0 | Surgery |
| 28 | Female | 55 | Adenocarcinoma | 2b | 0 | 0 | Surgery |
| 29 | Male | 74 | Adenocarcinoma | 3 | 0 | NA | Chemotherapy+Tirelizumab |
| 30 | Male | 72 | Adenocarcinoma | 4 | 3 | NA | Chemotherapy+Bevacizumab |
| 31 | Female | 69 | Adenocarcinoma | 1c | 0 | NA | NA |

Supplementary figure 1. The transcription factors of targeting the CaCRs.


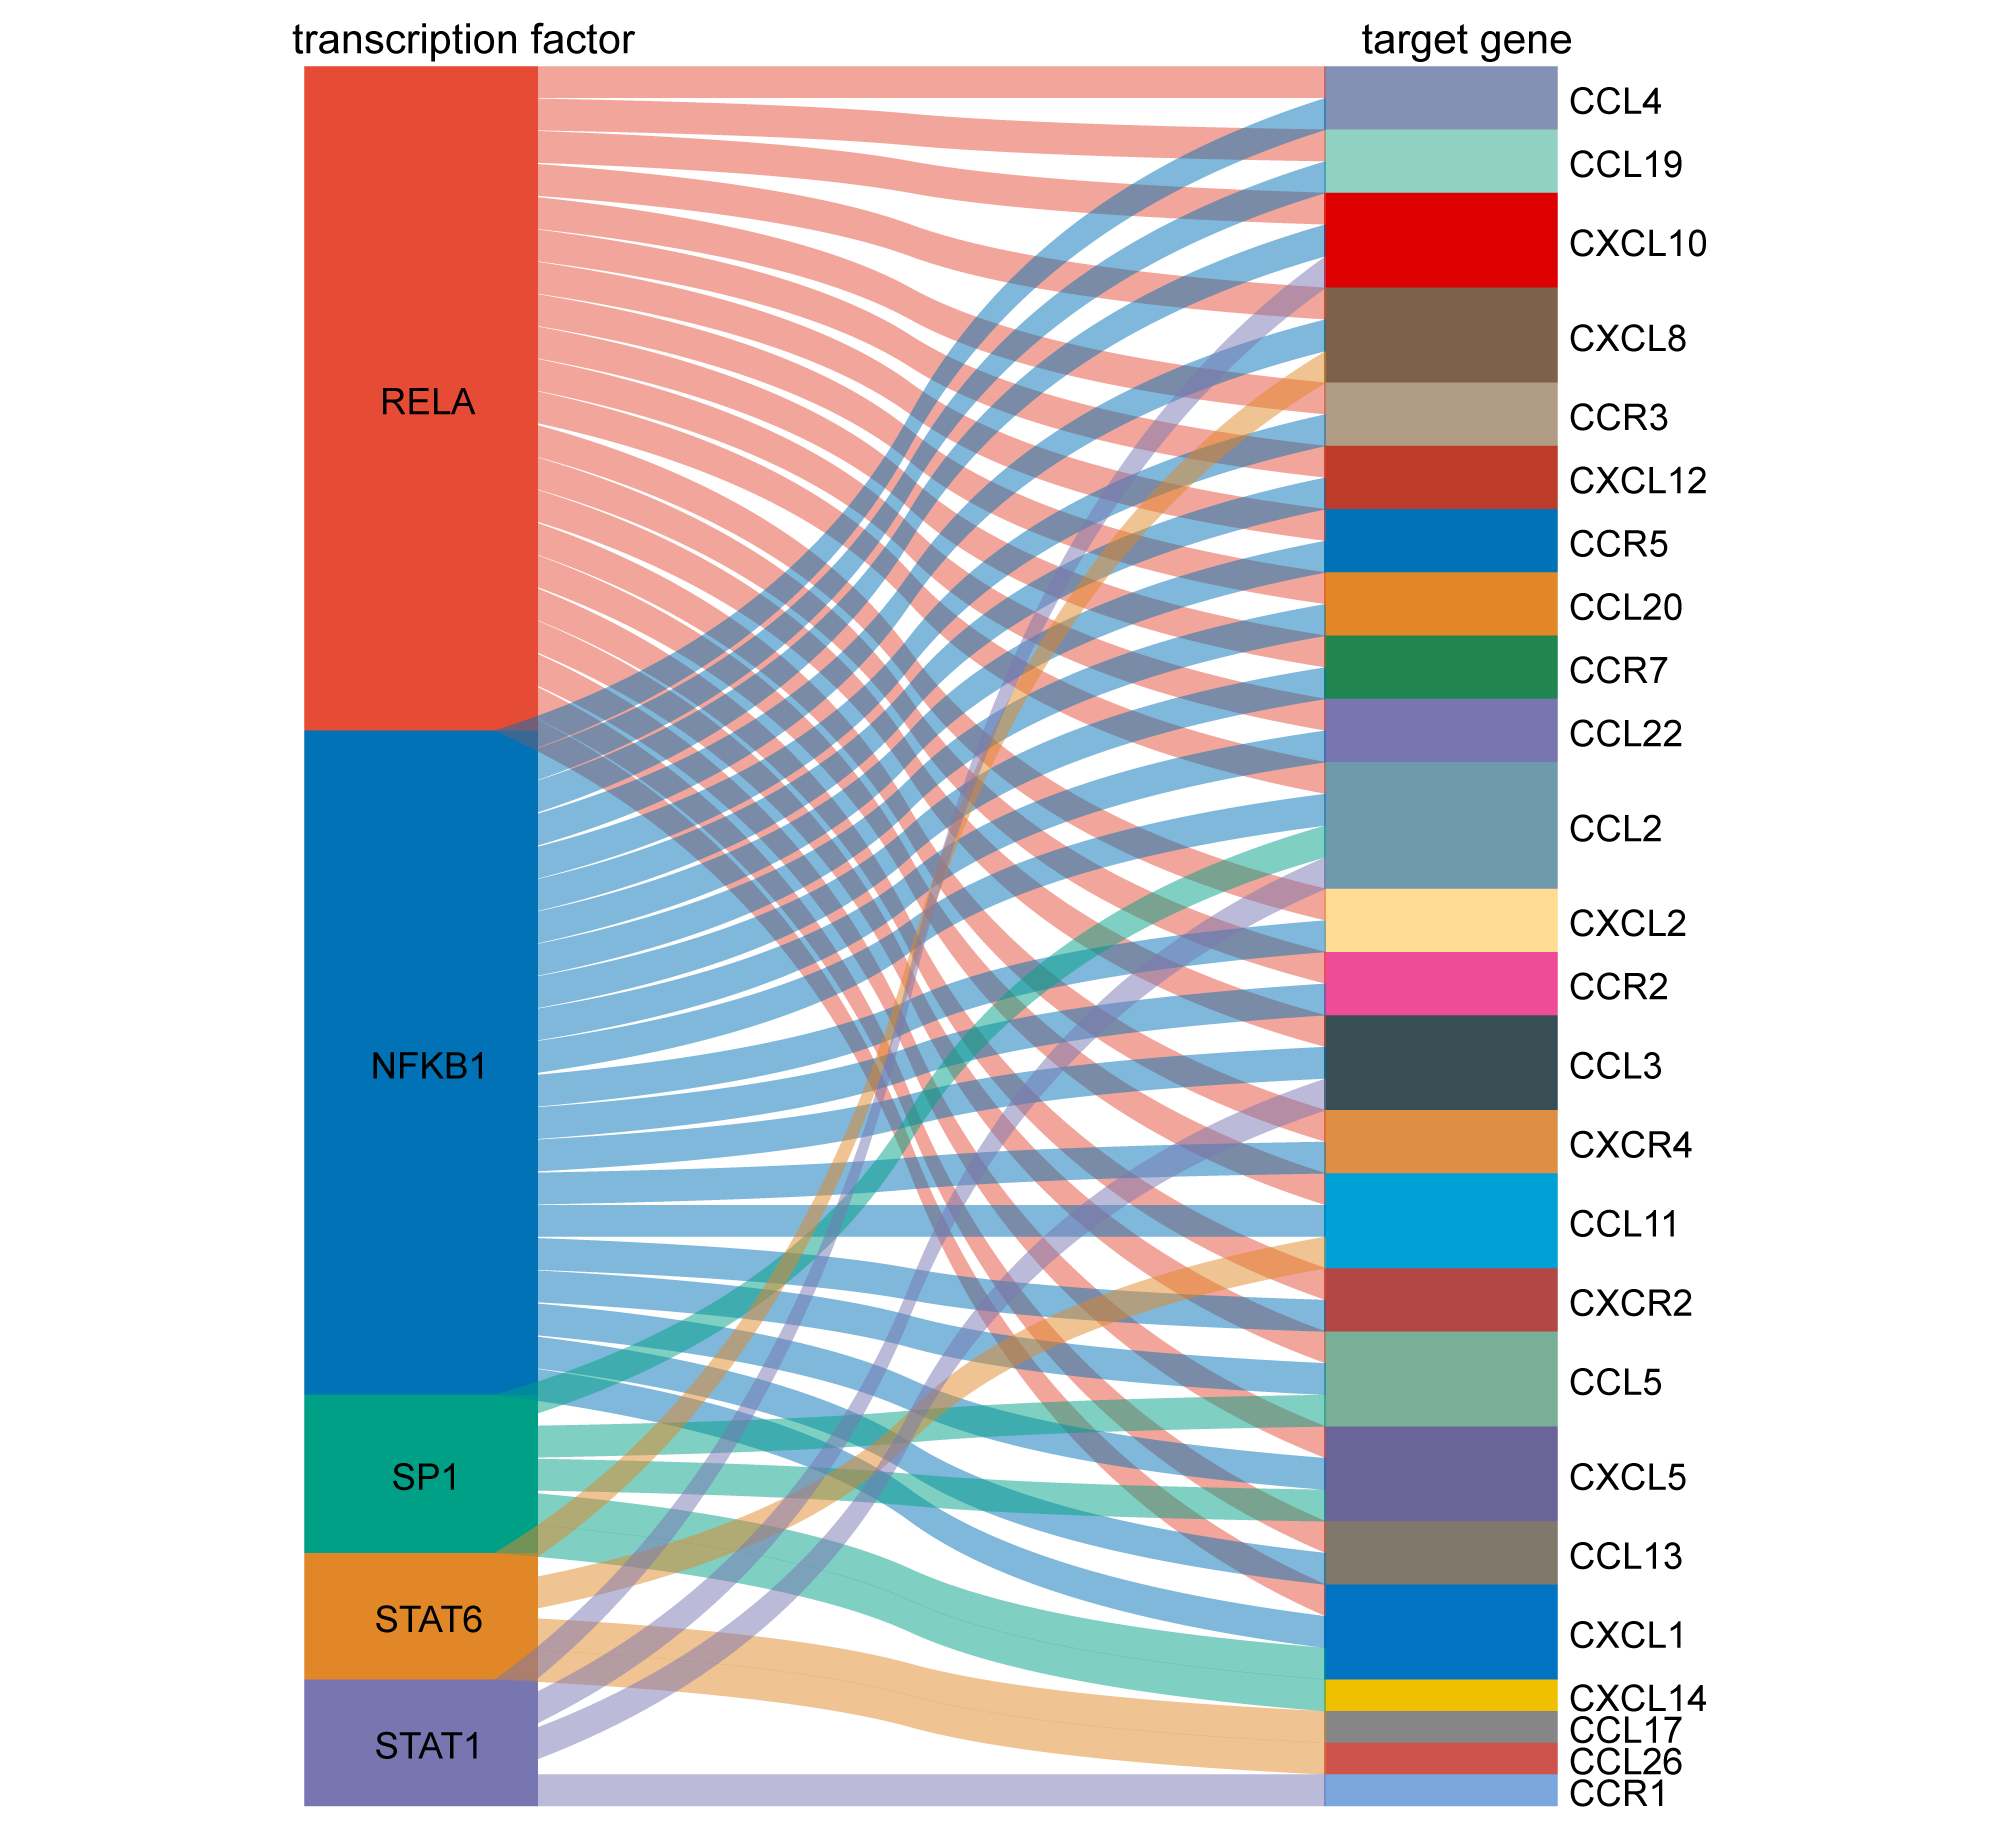


Supplementary figure 2. The correlation between CaCRs and the stromal score.


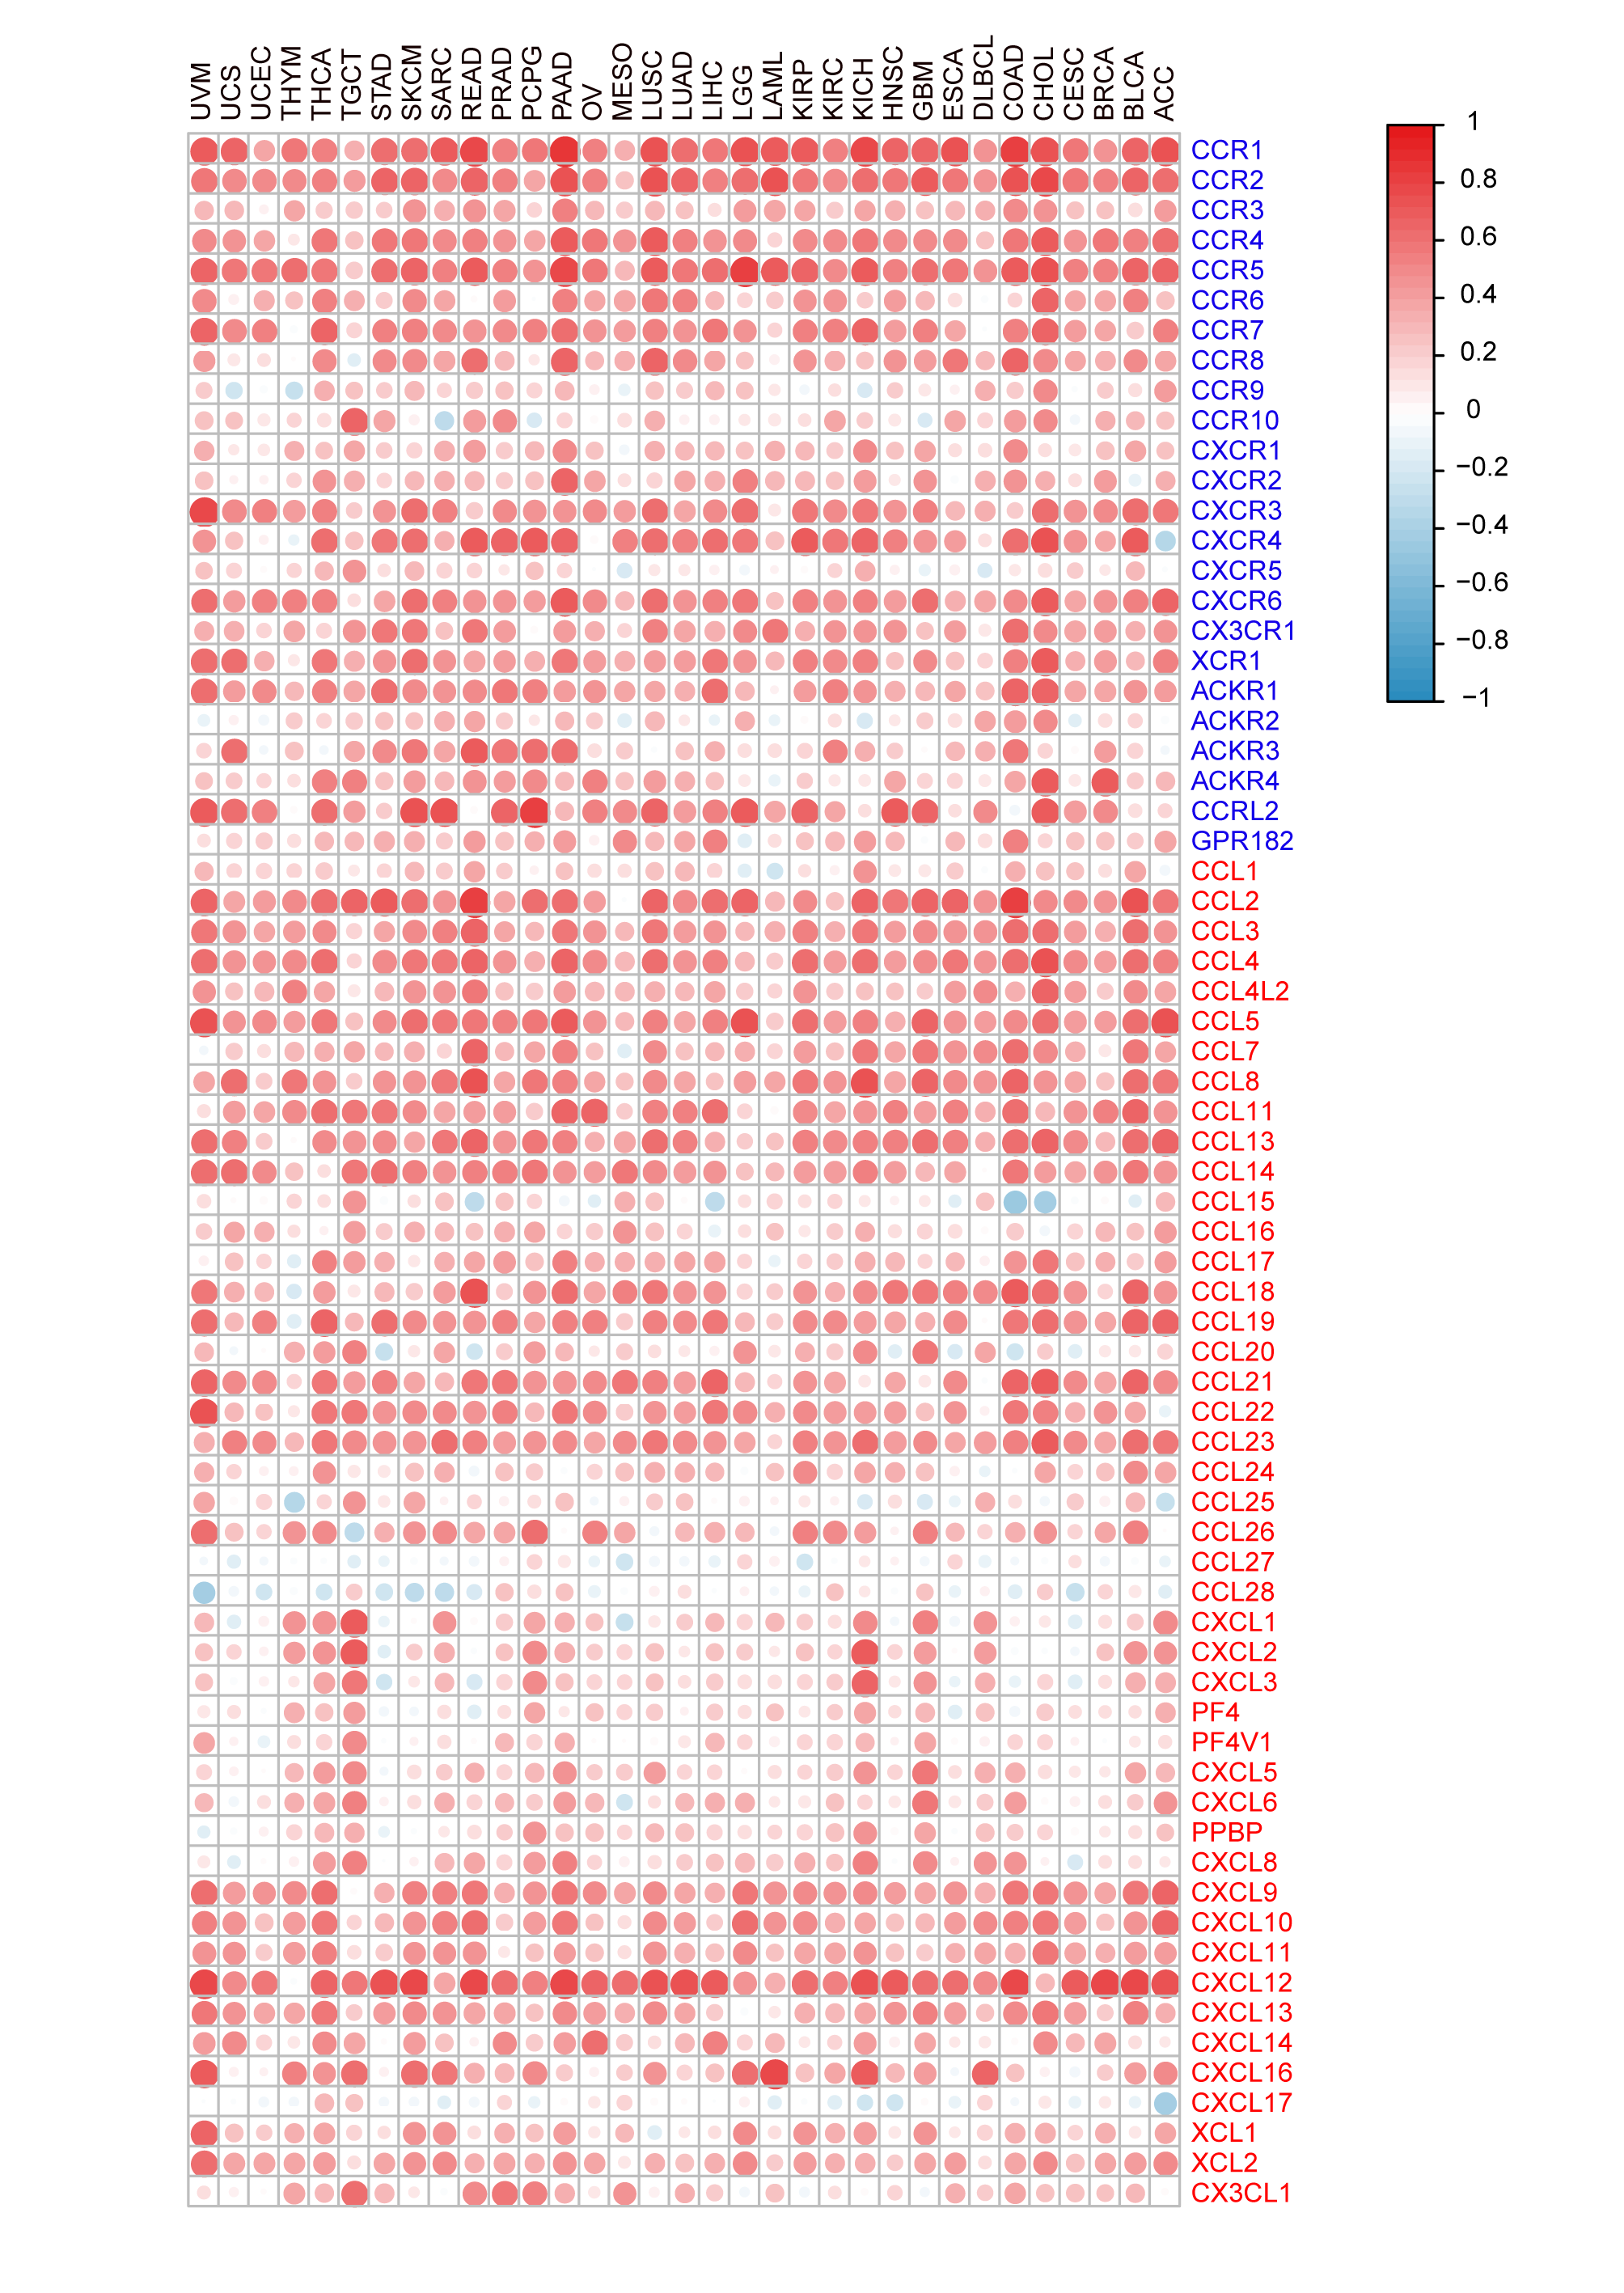


Supplementary figure 3. The correlation between CaCRs and the immune score.


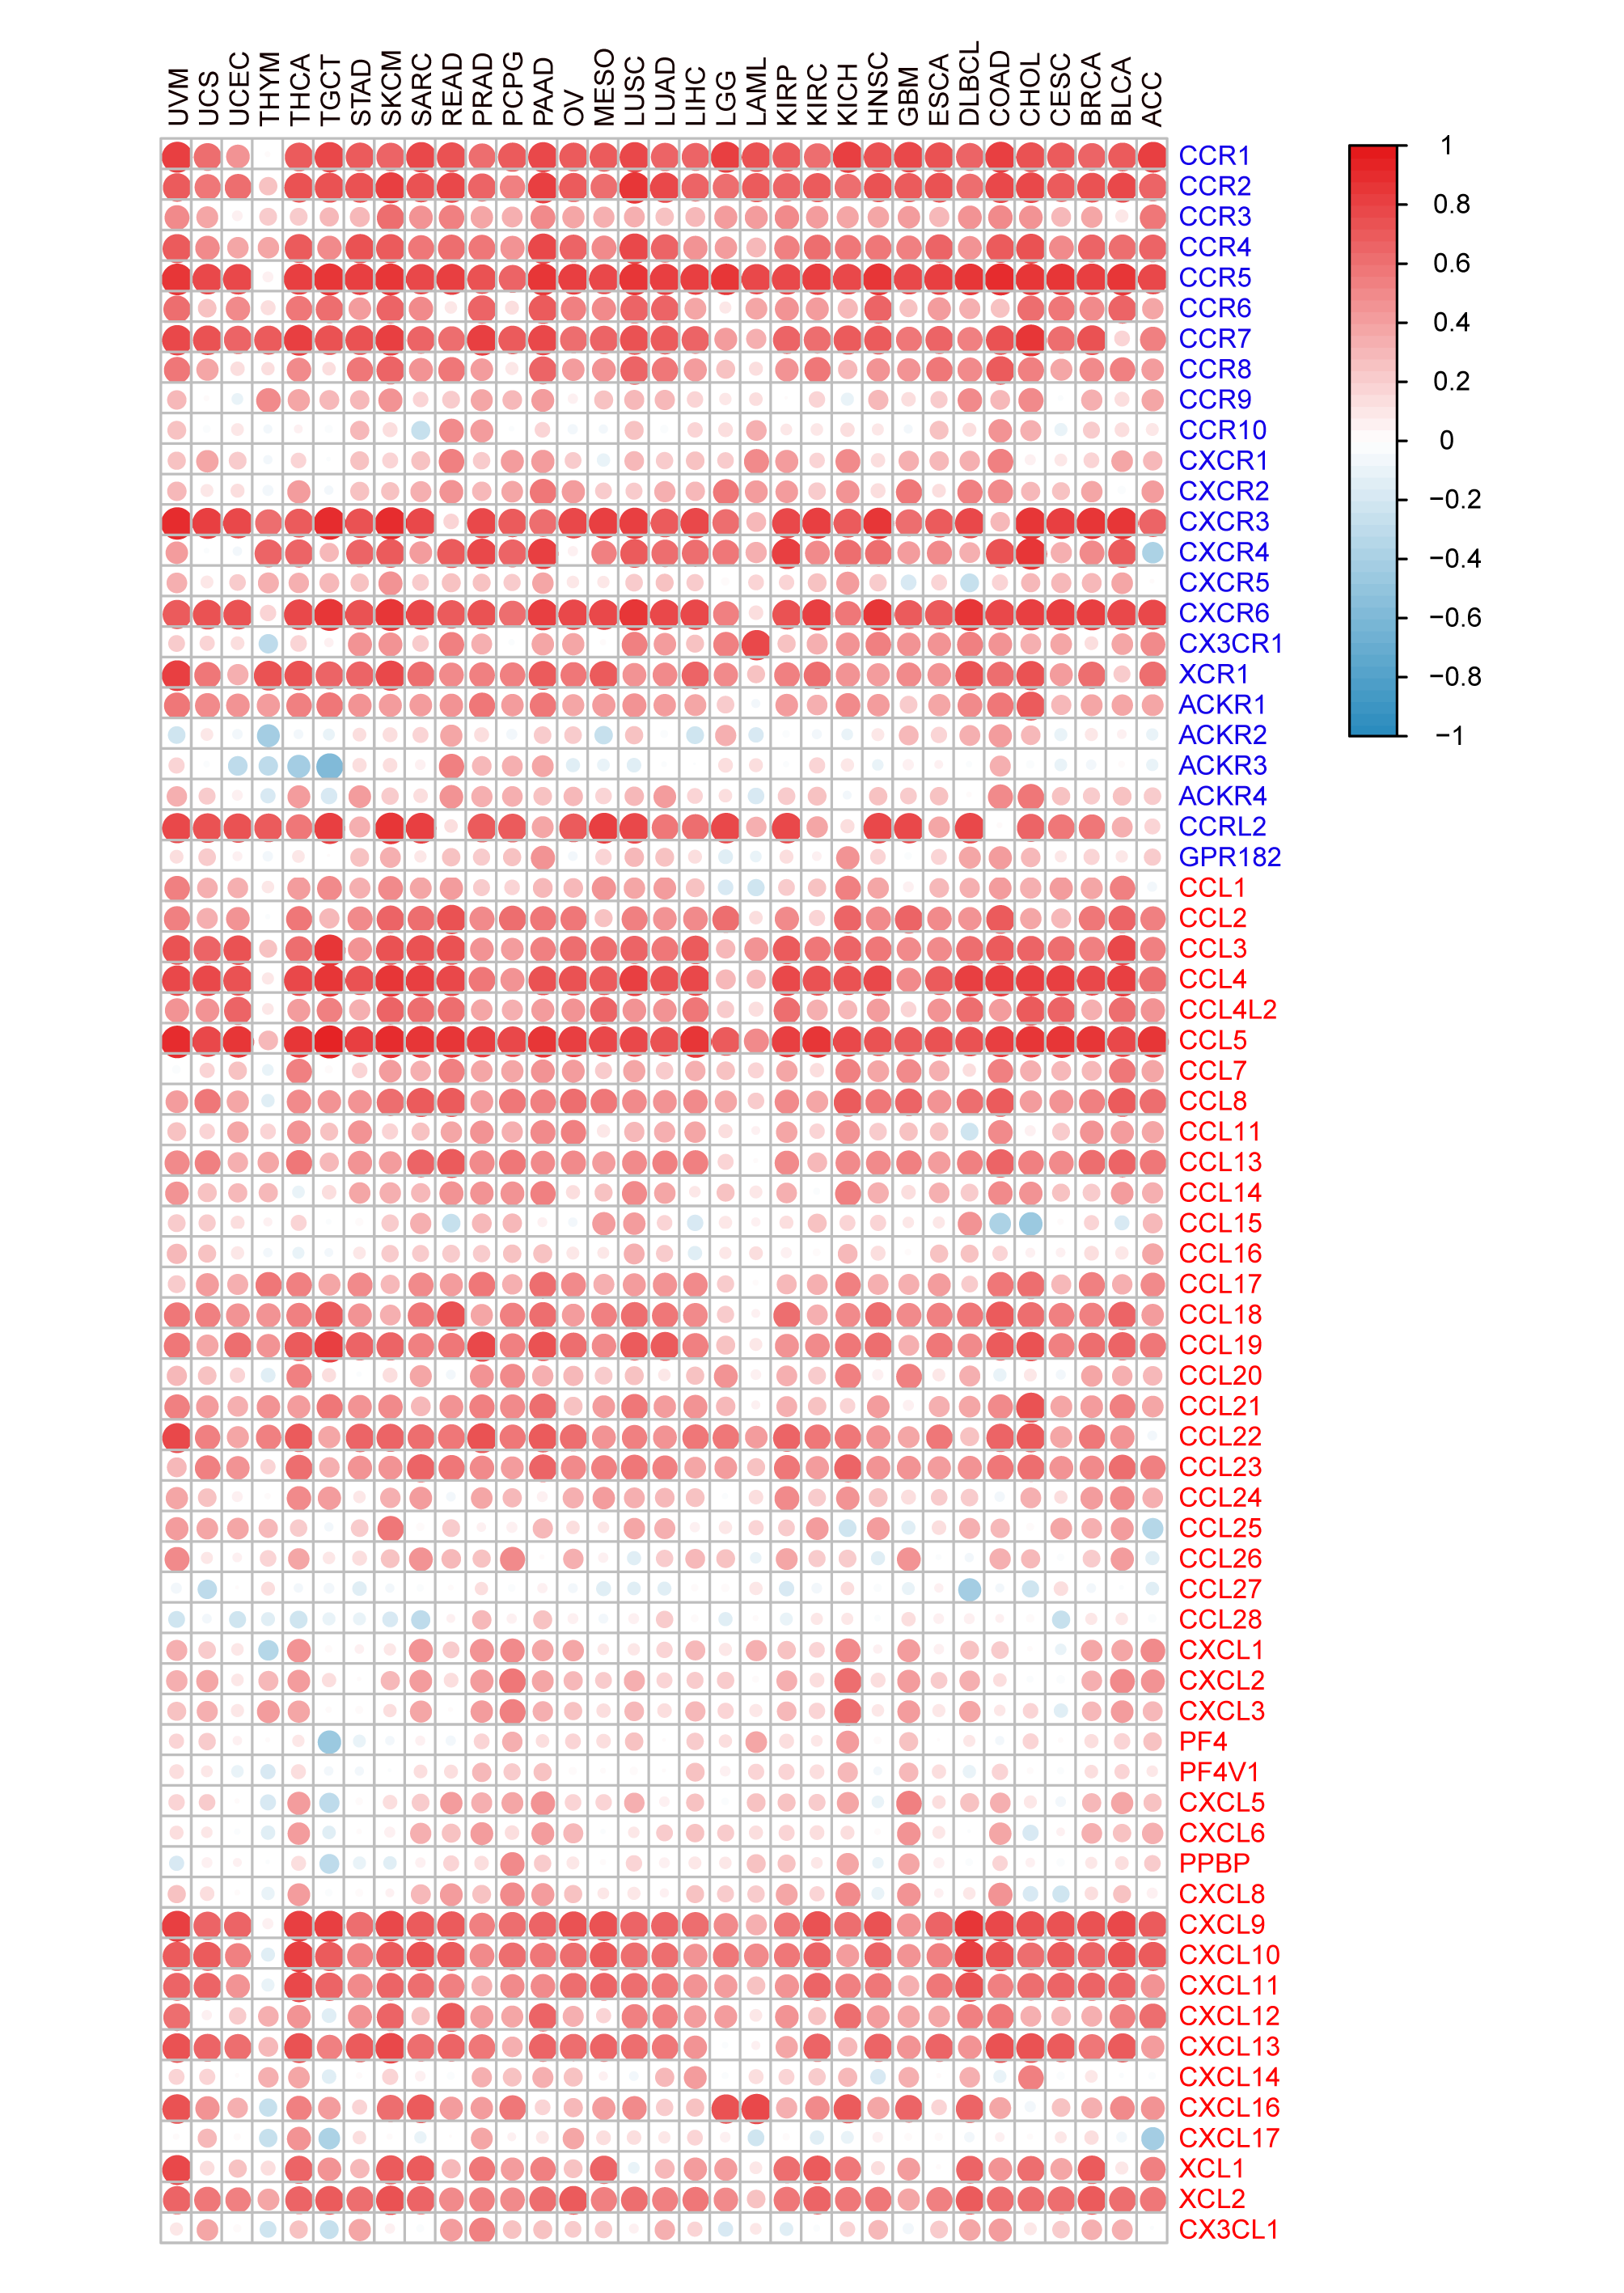


Supplementary figure 4. The correlation between CaCRs and the ESTIMATE score.


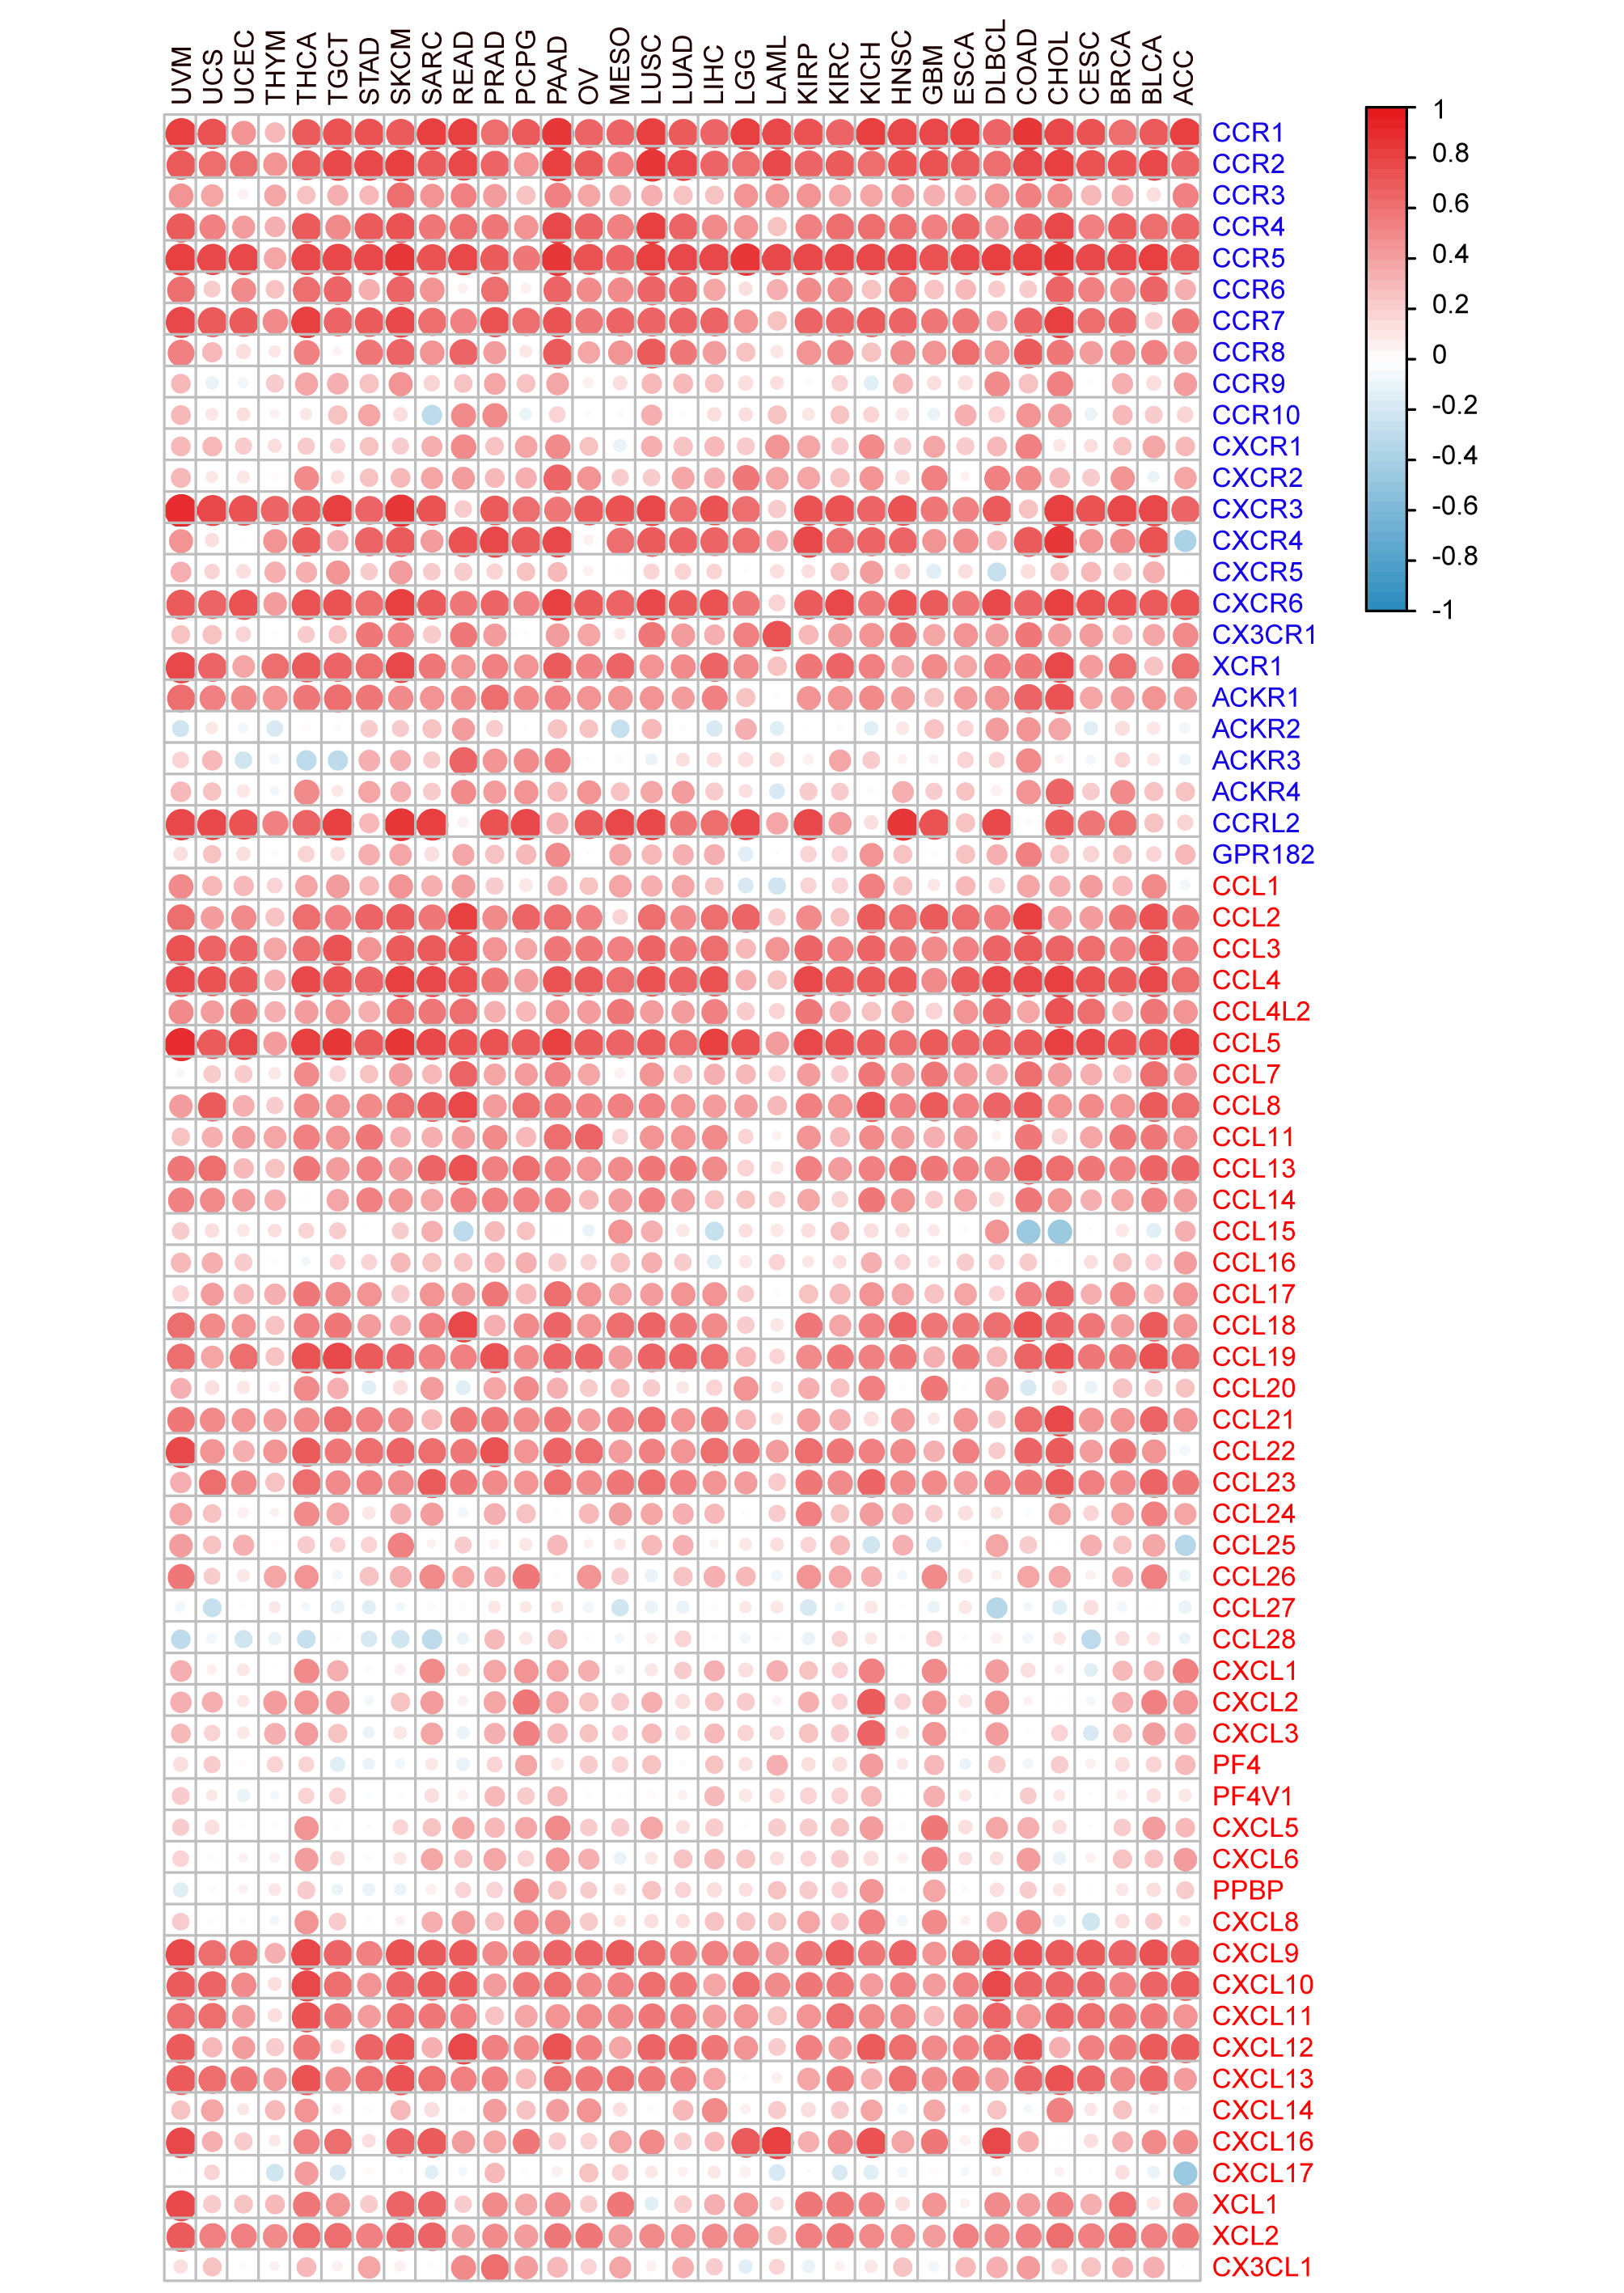


Supplementary figure 5. The correlation between CaCRs and the immune checkpoint genes.


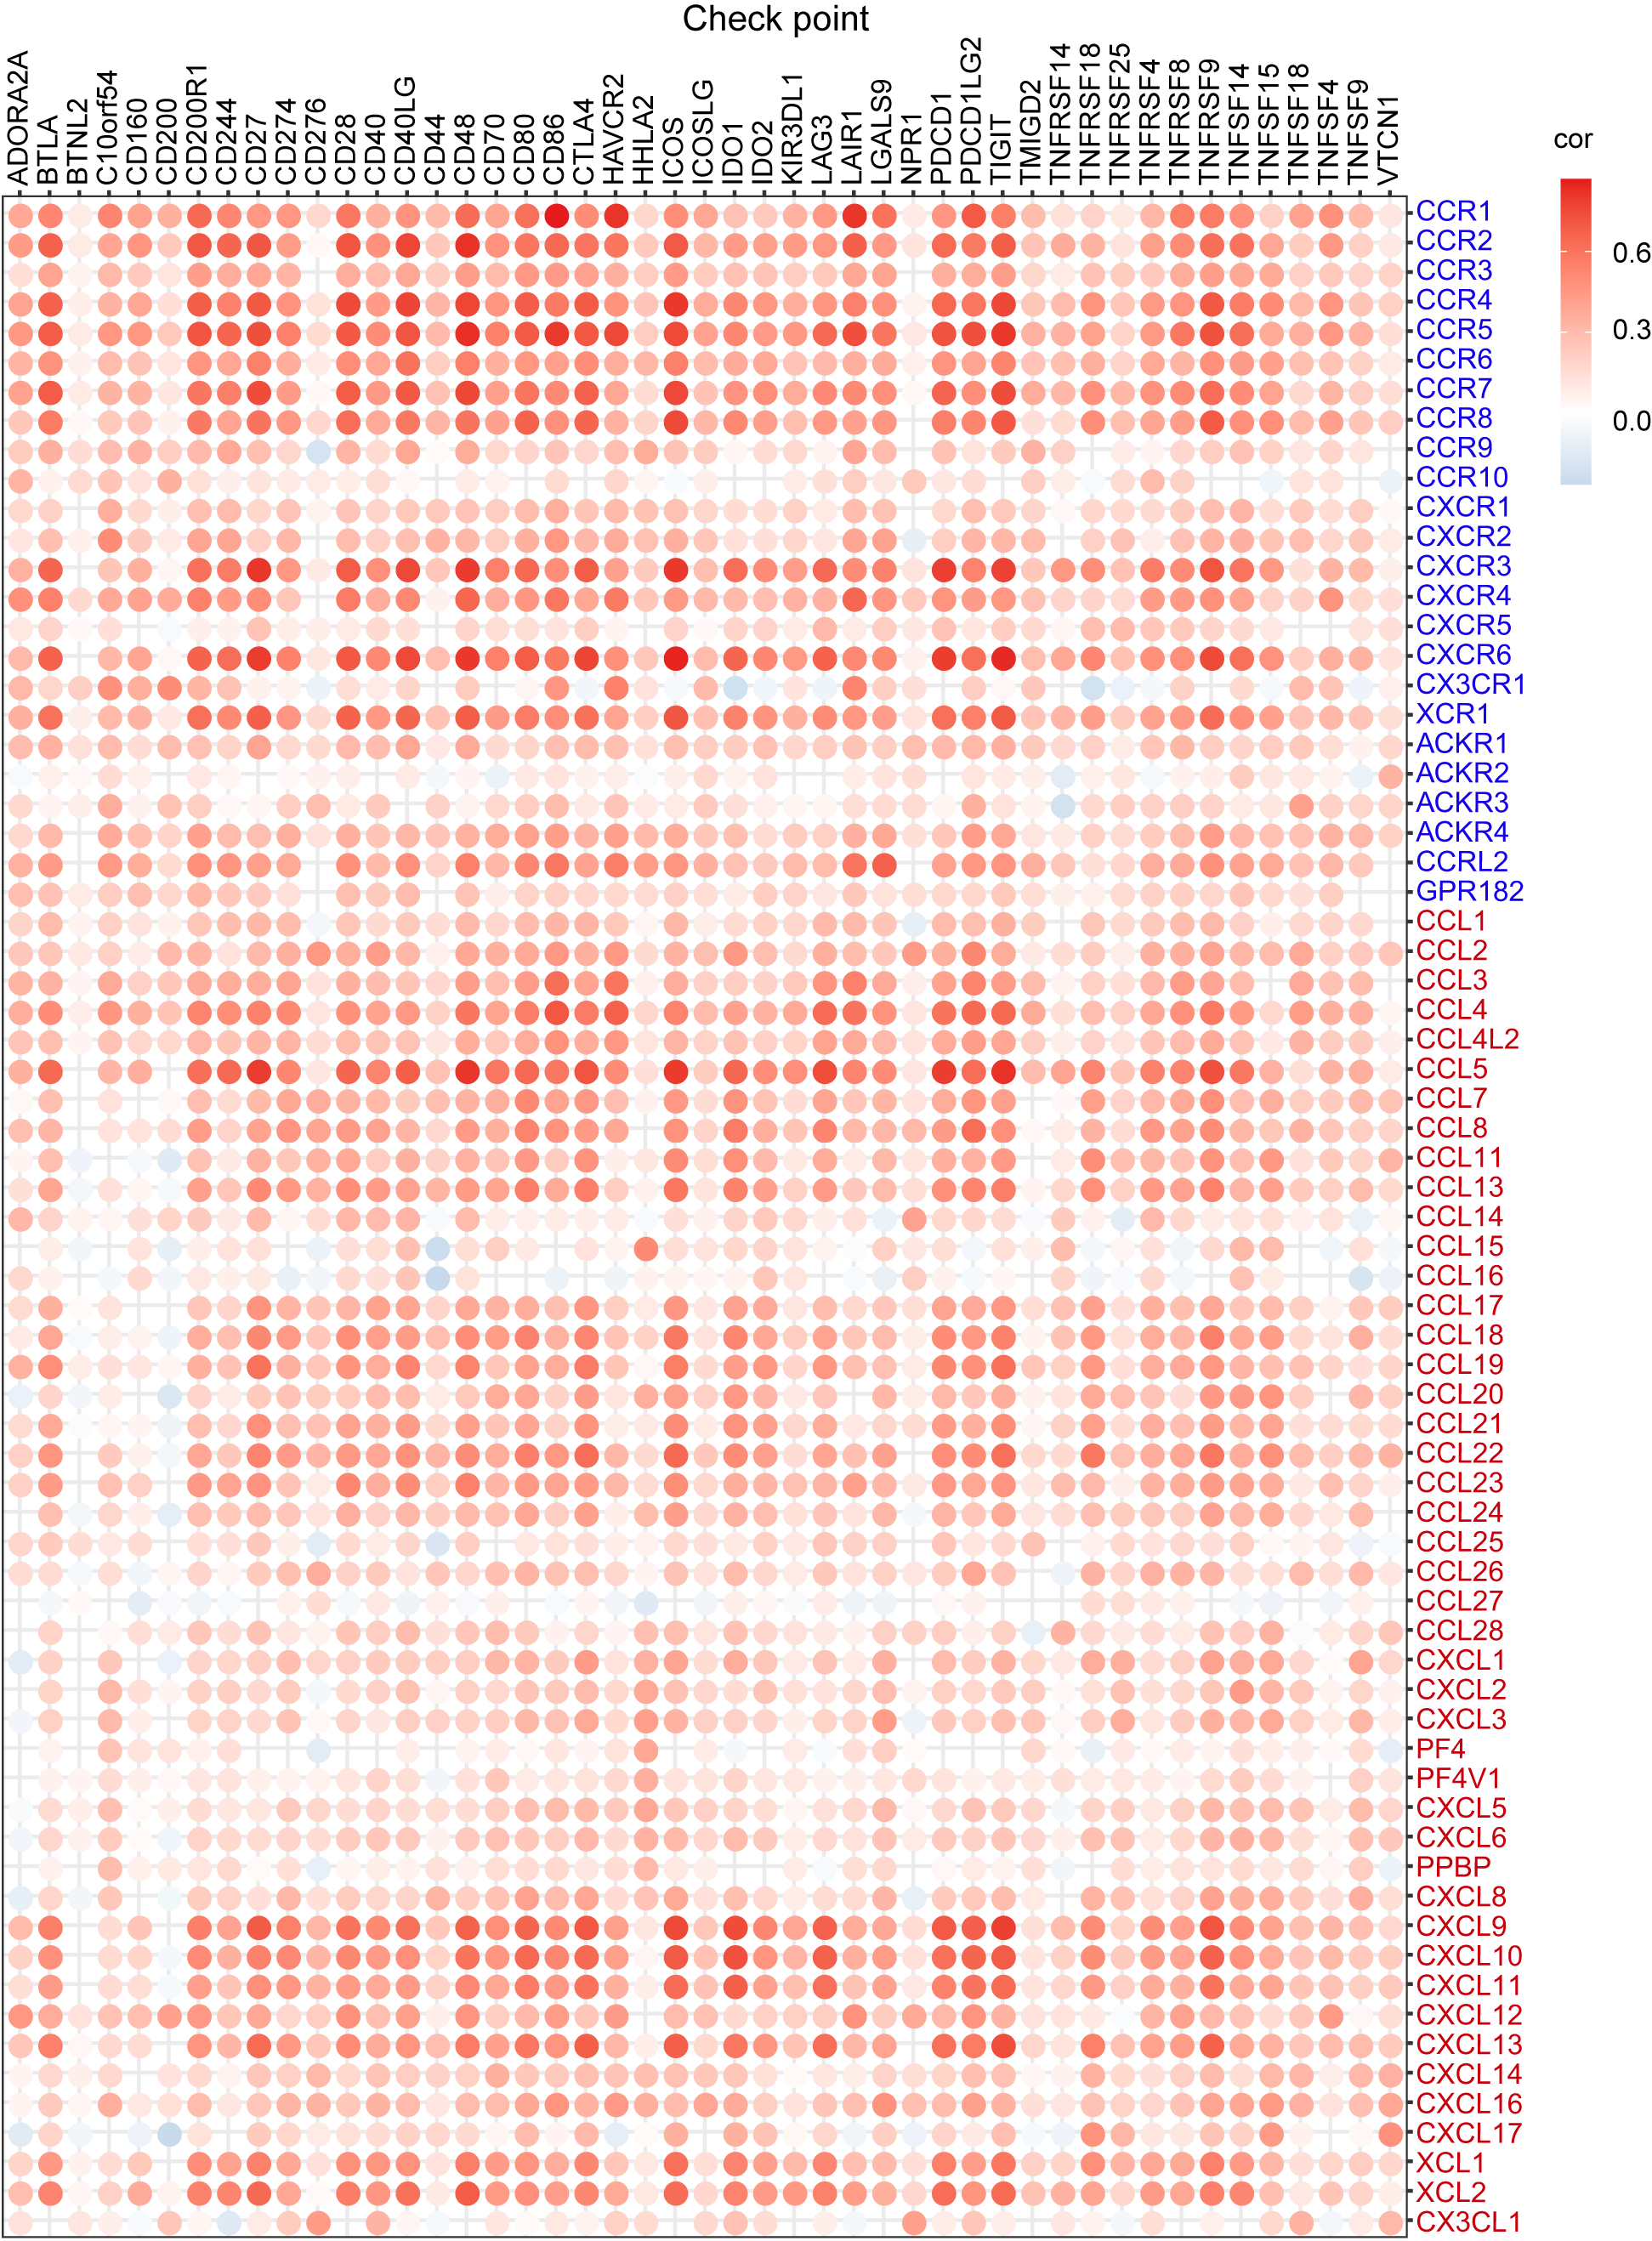

Supplement: Supplementary file 1 [file 537256%20Supplementary%20Material.docx]
